# Supplementary material for: Seed-Specific Expression of a Lysine-Rich Protein Gene, GhLRP, from Cotton Significantly Increases the Lysine Content in Maize Seeds
Source: MDPI journal article supplement (doi:10.3390/ijms15045350), 2014-03-27
Supplement: s1 [file s1]

# Supplementary Information

**Figure S1.** Open reading frame and amino acid sequence of the *GhLRP* gene. (A) Open reading frame sequence of the *GhLRP* gene; (B) GhLRP protein sequence; (C) Amino acid composition of the GhLRP protein.

(A)

|     |            |            |            |            |            |            |
|-----|------------|------------|------------|------------|------------|------------|
| 1   | ATGATCGGTA | GCCACACCGT | CTCGTCAACG | ACTCGACATT | TATTCCAGAC | ACAAACAACC |
| 61  | TCATCAGAGC | TGCCACAATT | GGCTTCAAAA | TACAAAAAGC | ACGAAGAGTC | TGAATACAAA |
| 121 | CAGCCAAAAT | ATCACGAAGA | GCACCCAAAA | CATGAGAAGC | CTGAAATGCA | CAAGGAGGAA |
| 181 | AGACAAAAAC | CCTACAAACA | ACATGAAGAG | TACCACGAGT | CACACGAATC | GAAGAAGCAC |
| 241 | GAAGAGTACA | ATAAAGACAA | ACCCGATTTC | CCCAAATGGG | AAAAGCCTAA | AGAGCACGAG |
| 301 | AAACACGAAG | TCGAATATCC | GAAAATACCC | GAGTACAAGG | ACAAACAAGA | TGAGGATAAG |
| 361 | GAACATAAAA | ATGAAGAGTT | CCACGAATCA | CGCGAATCAA | AGGAGCACAA | AGAGTATGAG |
| 421 | AAAGAAAAAC | CCGAGTTCCC | CAAACAGCAA | AAGCCTAAAG | AGCACGAGAA | ACACCAAGTC |
| 481 | GAATATCCGG | AAATAACCCA | GTACAAGGAA | GAGCAAGATA | AGAGTAAGGA | ACATAAAGAT |
| 541 | GAAGAGTGCC | ACGAGTCACA | CGAATCGAAA | GAGCACGAAG | AGTACTAG   |            |

(B)

|     |            |            |
|-----|------------|------------|
| 1   | MIGSHTVSST | TRHLFQTQTT |
| 21  | SSELPQLASK | YKKHEESEYK |
| 41  | QPKYHEEHPK | HEKPEMHKEE |
| 61  | RQKPYKQHEE | YHESHEKKH  |
| 81  | EEYNKDKPDF | PKWEKPKHEE |
| 101 | KHEVEYPKIP | EYKDKQDEDK |
| 121 | EHKNEEFHES | RESKEHKEYE |
| 141 | KEKPEFPKQQ | KPKEHEKHQV |
| 161 | EYPEITQYKE | EQDKSKEHKD |
| 181 | EECHESHESK | EHEEY*     |

(C)

| Amino acid | Num | %w/w  |
|------------|-----|-------|
| A Ala      | 1   | 0.32  |
| C Cys      | 1   | 0.44  |
| D Asp      | 7   | 3.36  |
| E Glu      | 47  | 24.93 |
| F Phe      | 4   | 2.38  |
| G Gly      | 1   | 0.27  |
| H His      | 22  | 12.30 |
| I Ile      | 3   | 1.42  |
| K Lys      | 36  | 18.97 |
| L Leu      | 3   | 1.42  |
| M MET      | 2   | 1.08  |
| N Asn      | 2   | 0.95  |
| P Pro      | 14  | 5.81  |
| Q Gln      | 12  | 6.32  |
| R Arg      | 3   | 1.88  |
| S Ser      | 14  | 5.30  |
| T Thr      | 7   | 3.01  |
| V Val      | 3   | 1.27  |
| W Trp      | 1   | 0.74  |
| Y Tyr      | 12  | 7.84  |

**Figure S2.** Selection of maize resistant callus and plant regeneration. (A) Maize callus on selection medium containing 15 mg/L hygromycin; (B) Differentiation of resistant callus; (C) Regenerated plants in the rooting medium; (D) Regenerated plants in a flowerpot; (E) Regenerated plants in the field; (F) T<sub>0</sub> transgenic maize seeds.

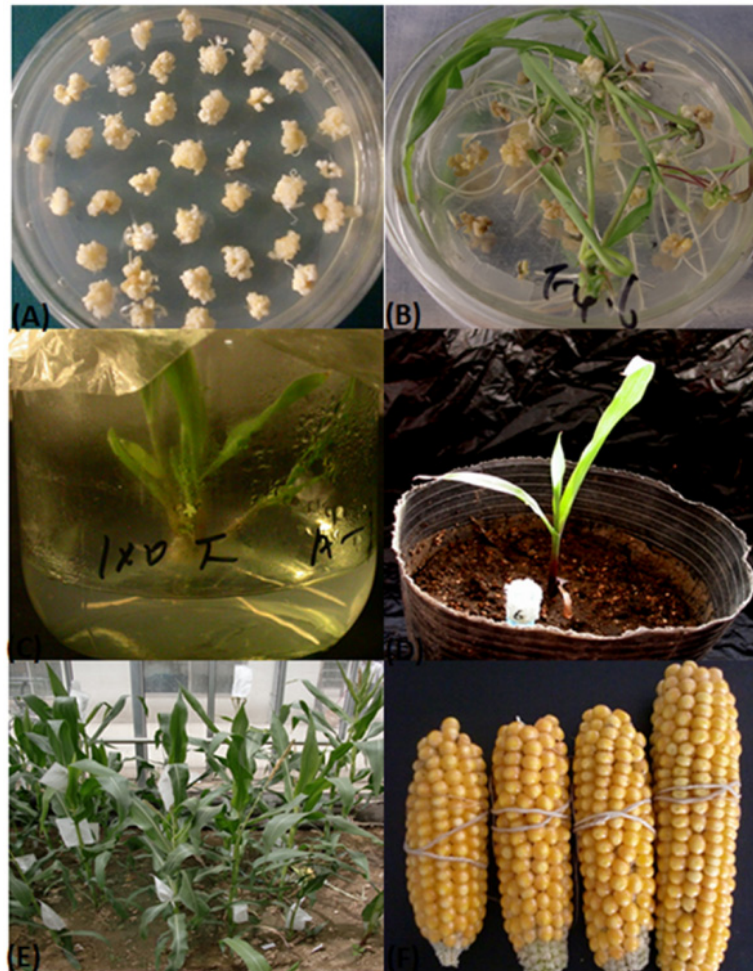

**Figure S3.** Zein and non-zein accumulation pattern in T<sub>4</sub> kernels of three transgenic lines. (A) Zein content; (B) Non-zein content. All the calculations were performed with technical triplicates and biological triplicates, and 20 mature kernels were used per assay. Student's *t*-test is used to evaluate the difference between the transgenic maize and WT (\* *p* < 0.05; \*\* *p* < 0.01); (C) Zein proteins of WT, F12, F78, and F88 lines were analyzed by SDS-PAGE. For SDS-PAGE, 5 µL samples were loaded to 15% polyacrylamide gel. The size for each protein marker and sample band was indicated by the numbers in the “kDa” columns.

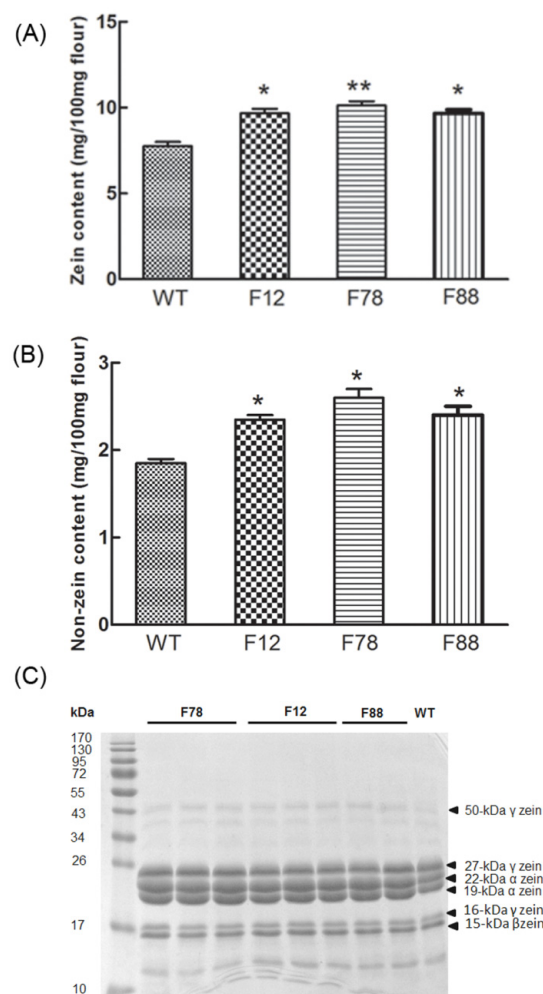

**Table S1.** Agronomic traits of T<sub>3</sub> kernels in three transgenic lines.

| Line            | PH (cm)     | EH (cm)    | EL (cm)    | BTL (cm)  | ED (cm)    | ER | KW (g)     |
|-----------------|-------------|------------|------------|-----------|------------|----|------------|
| F12             | 200.7 ± 3.2 | 98.7 ± 5.4 | 11.8 ± 1.8 | 1.0 ± 0.7 | 37.7 ± 0.8 | 14 | 24.4 ± 0.9 |
| F78             | 198.5 ± 7.5 | 89.3 ± 5.8 | 13.2 ± 1.6 | 0.4 ± 0.3 | 42.7 ± 1.2 | 16 | 25.2 ± 1.2 |
| F88             | 210.3 ± 4.2 | 92.3 ± 4.2 | 12.0 ± 1.3 | 1.9 ± 1.4 | 39.2 ± 2.8 | 14 | 27.3 ± 3.4 |
| WT <sup>a</sup> | 202.5 ± 5.8 | 89.3 ± 3.8 | 11.3 ± 2.3 | 0.7 ± 0.6 | 39.8 ± 0.3 | 16 | 26.8 ± 4.0 |

<sup>a</sup> The segregating populations of hybrid 08 × 178 in T<sub>3</sub> were used as a control (WT). PH, plant height; EH, ear height; EL, ear length; BTL, bald tip length; ED, ear diameter; ER, number of ear rows; KW, 100-kernel weight. Values are average measurements for each line in T<sub>2</sub> progenies ± standard deviation. Differences in agronomic traits between transgenic lines and WT were analyzed using a Student's *t*-test.
